# Supplementary material
Source: PubMed Central journal article supplement (PMC9564002)

# Fig S1. Fungal DNA is present in multiple cancer types not explained by contamination

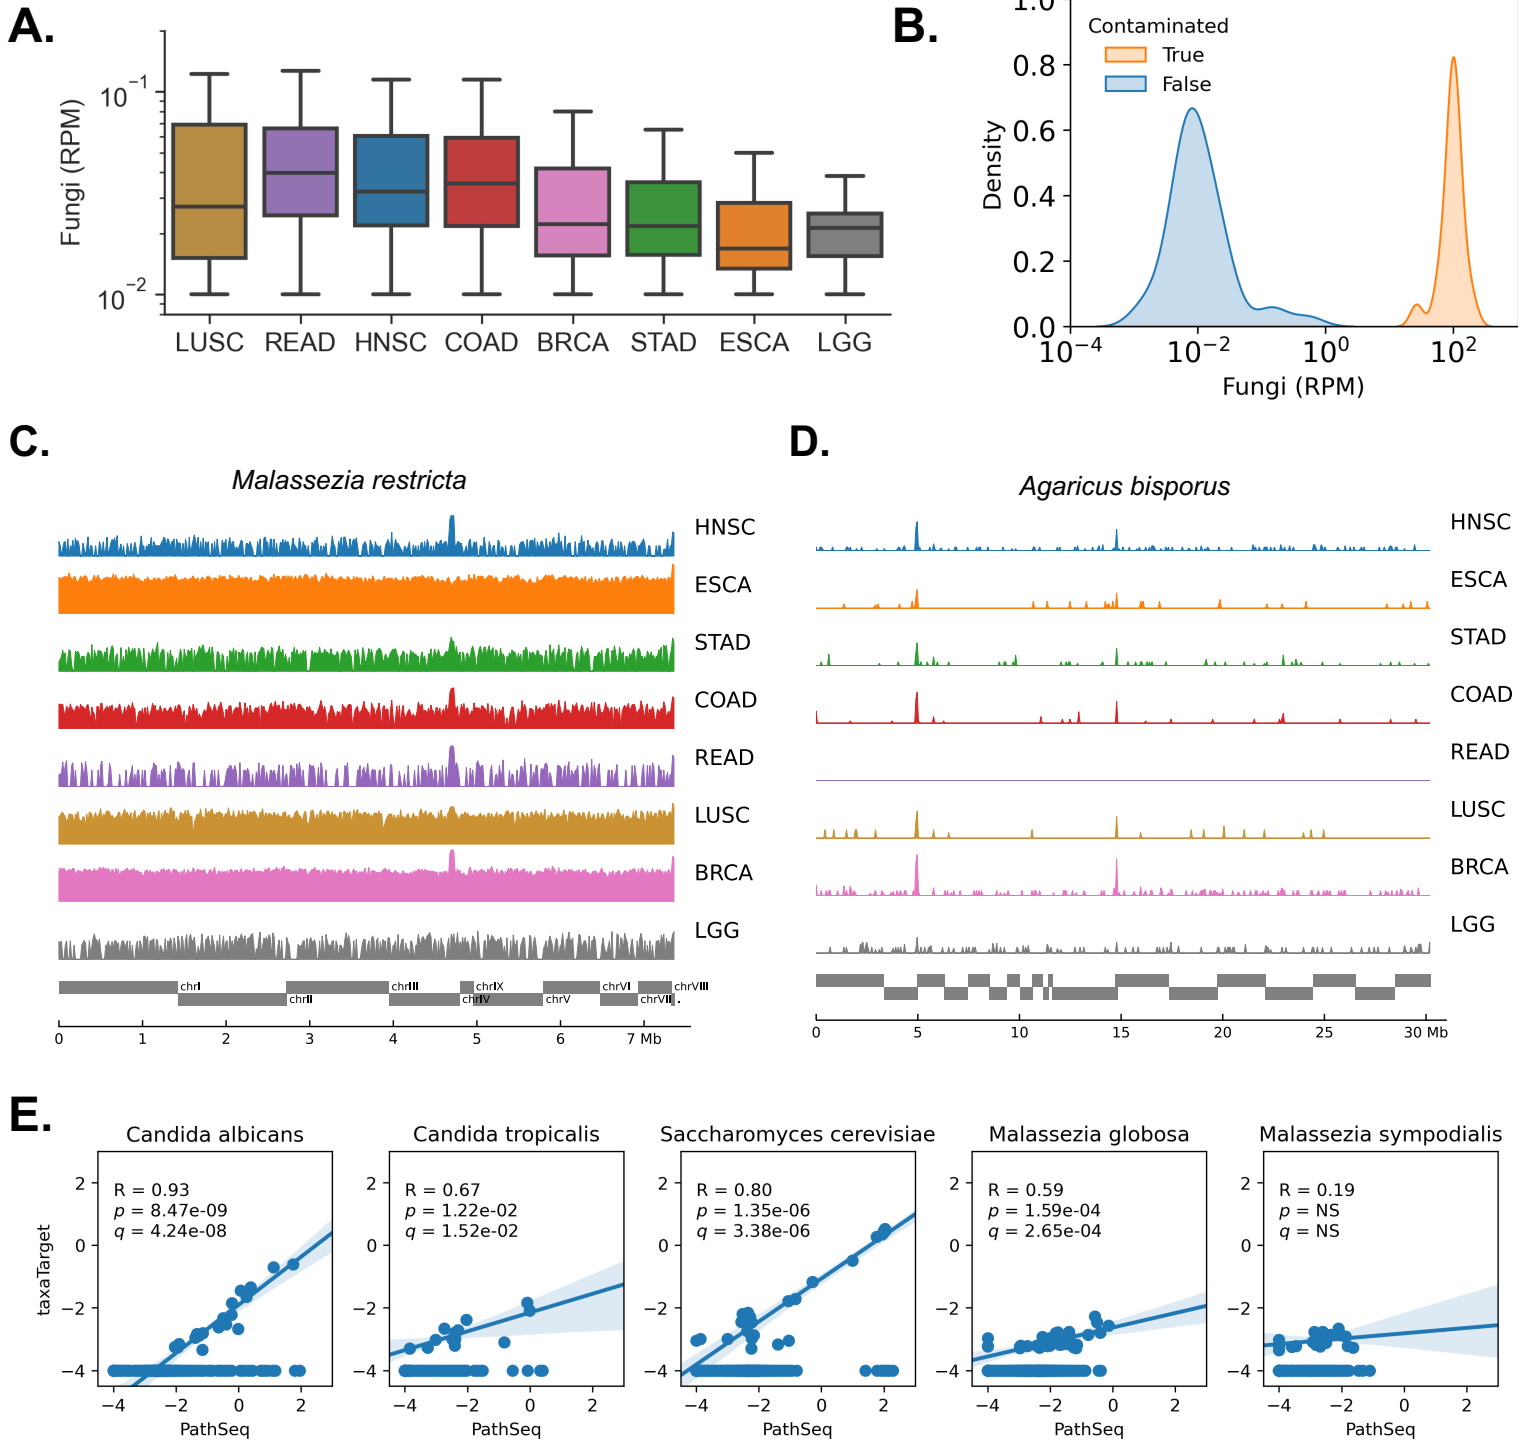

**Fig S2. Primary tumor samples harbor disease-specific mycobionmes**

**A.**

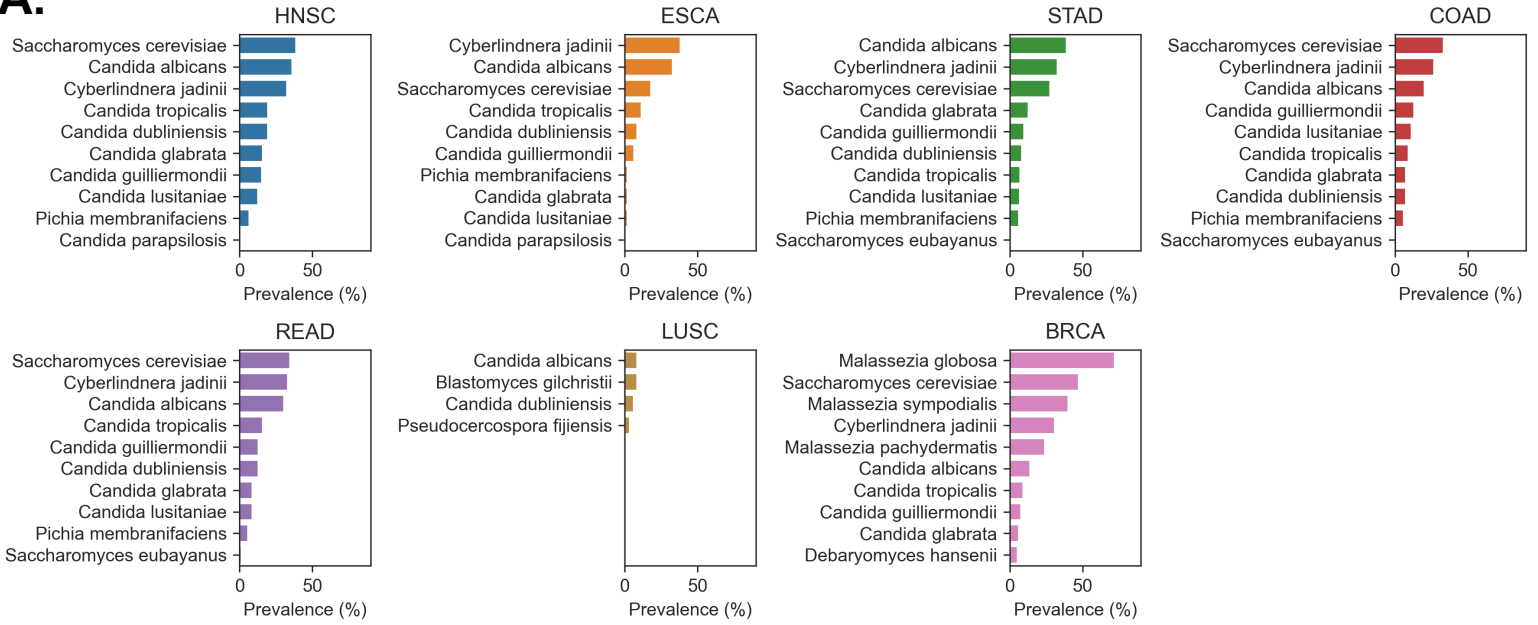

# Fig S3. Trans-kingdom analysis reveals *Candida*- and *Saccharomyces*-associated GI cancer co-abundance groups

## A. HNSC

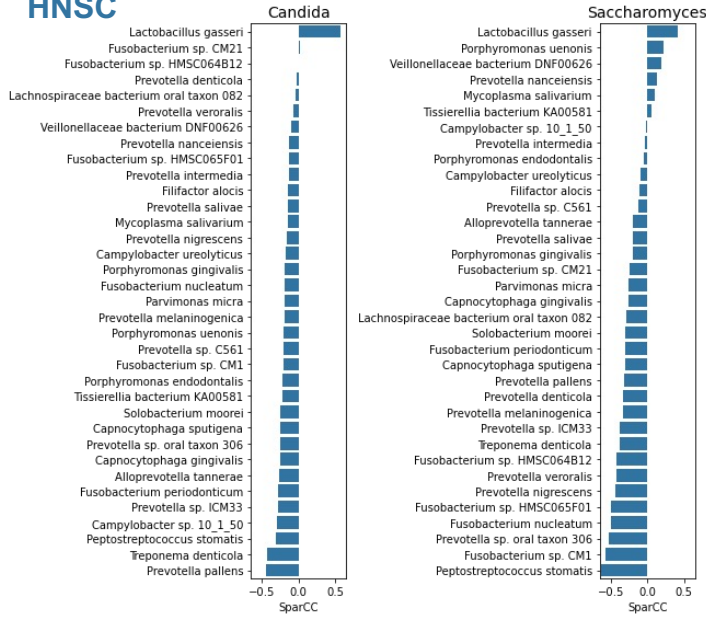

## B. STAD

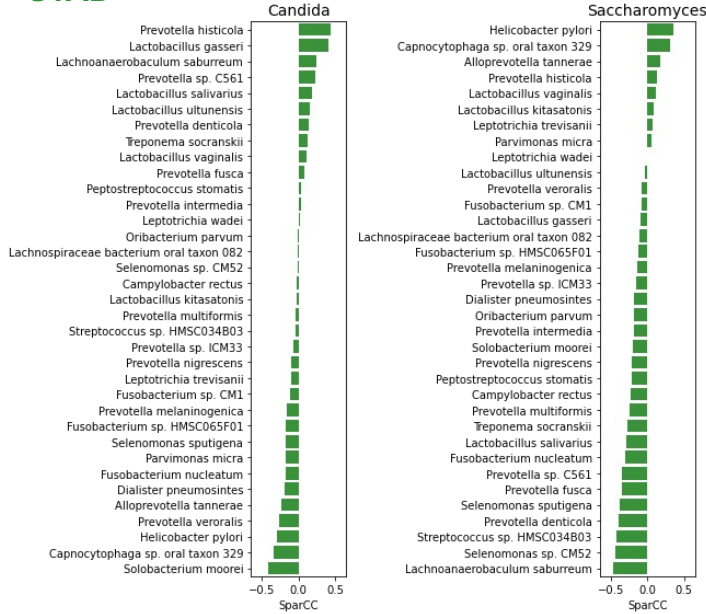

## C. COAD

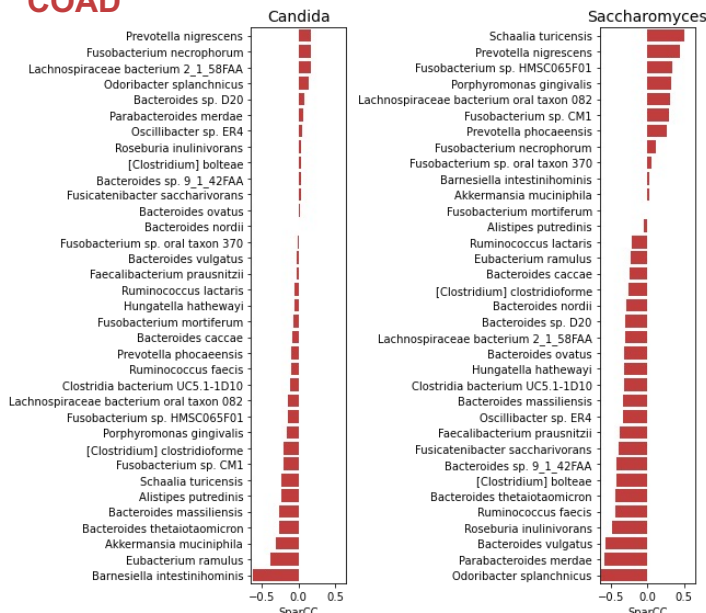

## D. HNSC

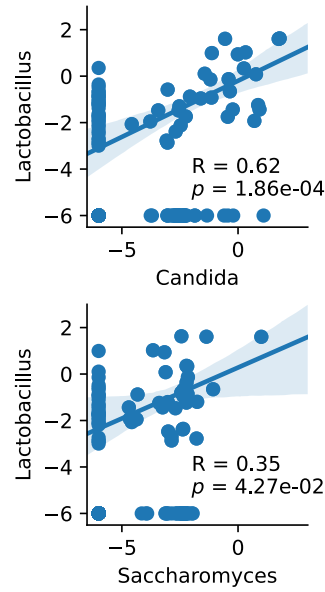

## E. STAD

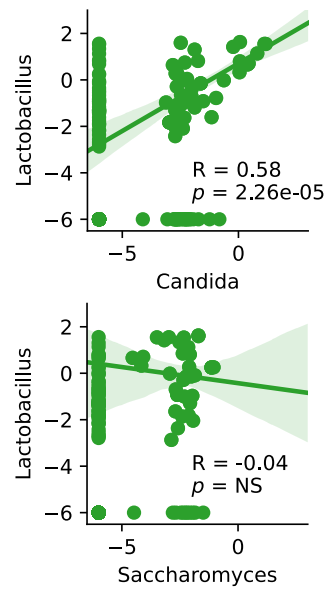

## F. COAD

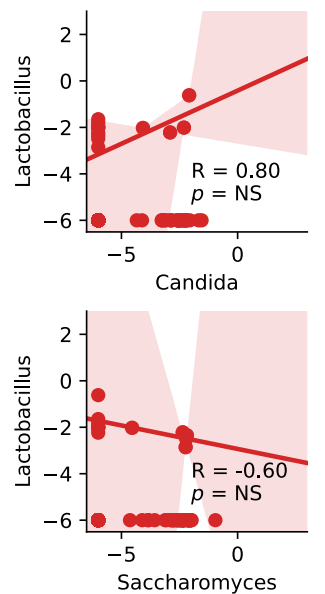

**Fig S4.** Candida is associated with late-stage and metastatic GI cancers

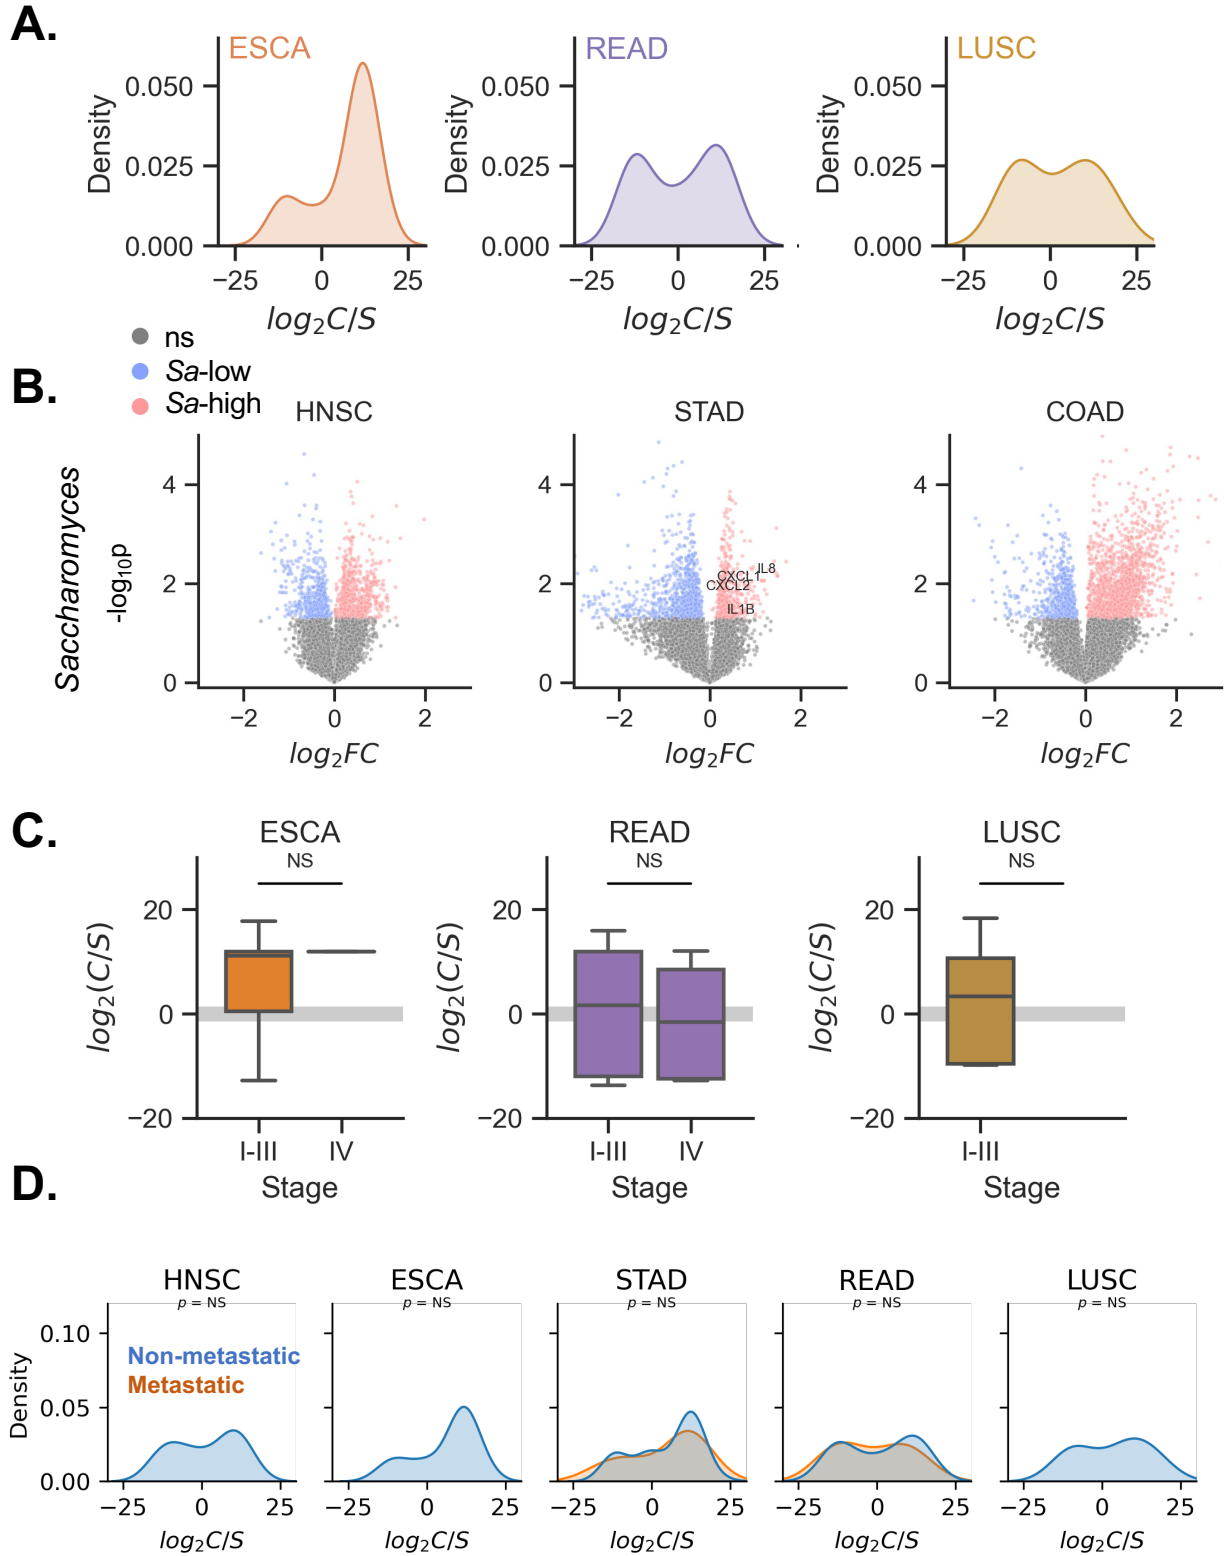

**Fig S5:** Live, transcriptionally active *Candida* species are associated with GI tumors

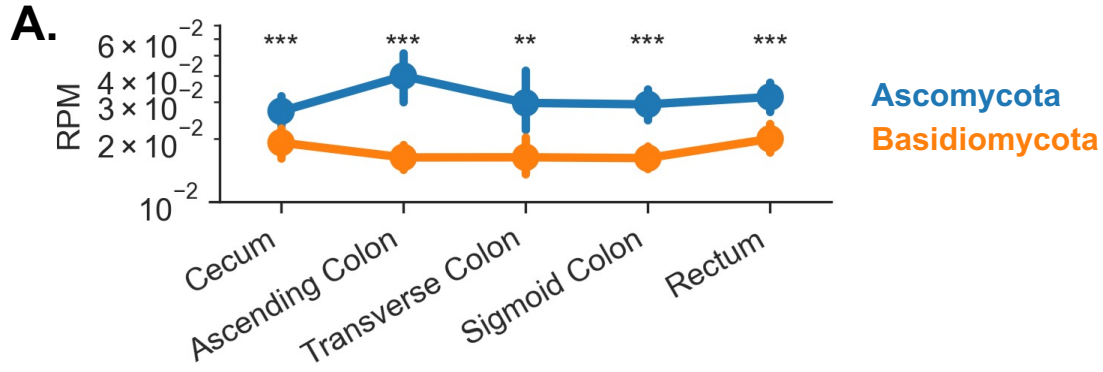

**Fig S6.** Cancer-associated mycobiota in the lung and GI clinical outcomes

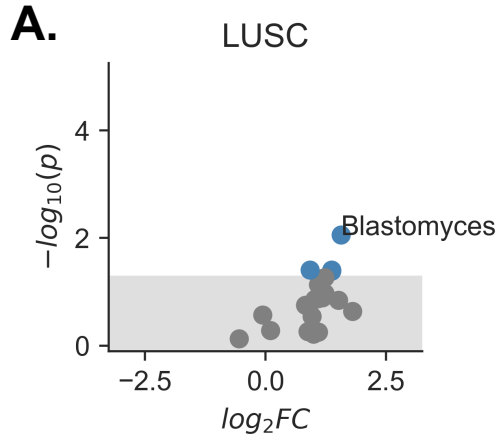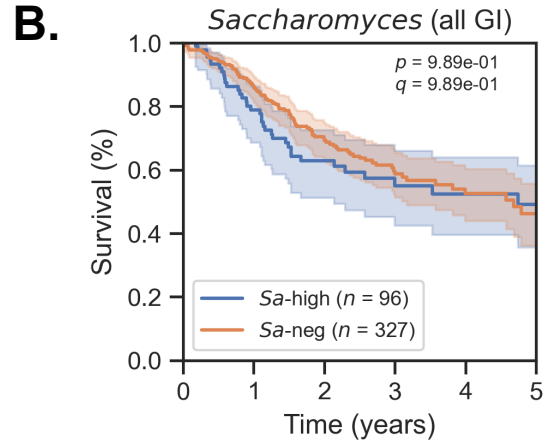

Supplement: NIHMS1835376-supplement-1.pdf [file NIHMS1835376-supplement-1.pdf]
